# Supplementary material for: Synthesized akhtenskites remove ammonium and manganese from aqueous solution: removal mechanism and the effect of structural cations
Source: Royal Society of Chemistry journal article supplement (doi:10.1039/d1ra06025b), 2021-01-01
Supplement: d1ra06025b1.pdf [file d1ra06025b1.pdf]

## Supplemental materials

### Figures

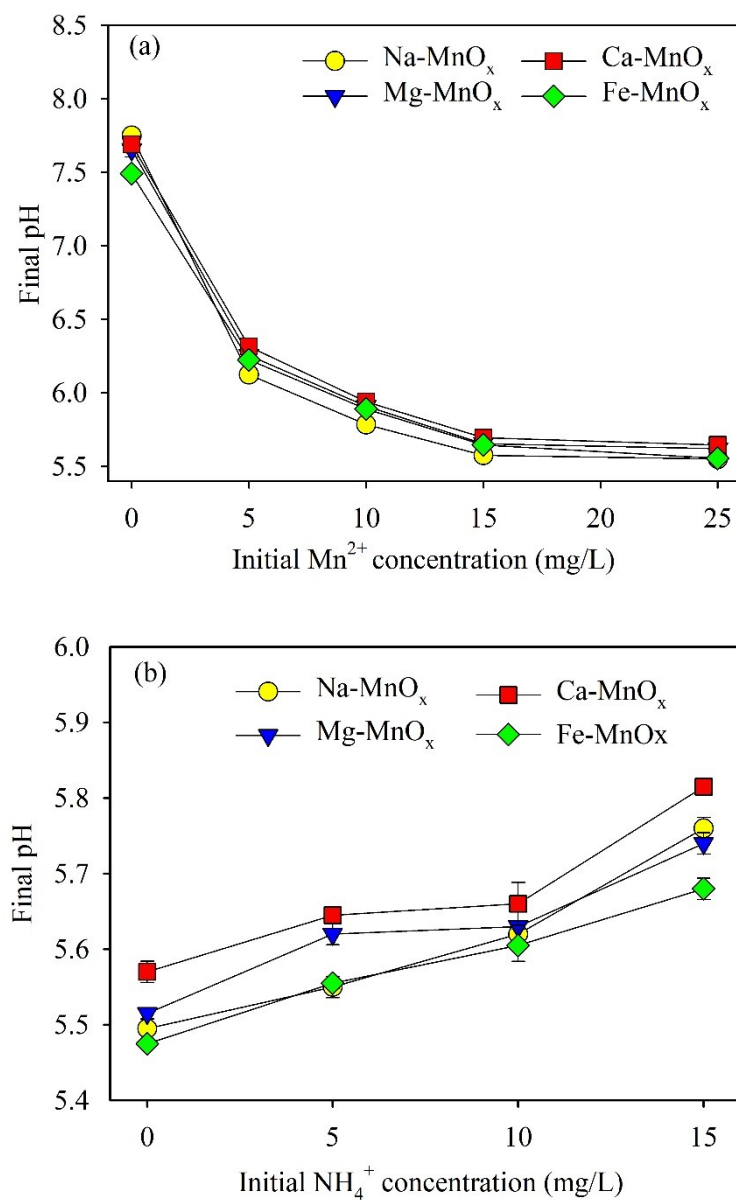

Fig.S1 The final pH in (a) ammonium removal at different initial concentration of Mn<sup>2+</sup> and (b) Mn<sup>2+</sup> removal at different initial concentration of NH<sub>4</sub><sup>+</sup>.

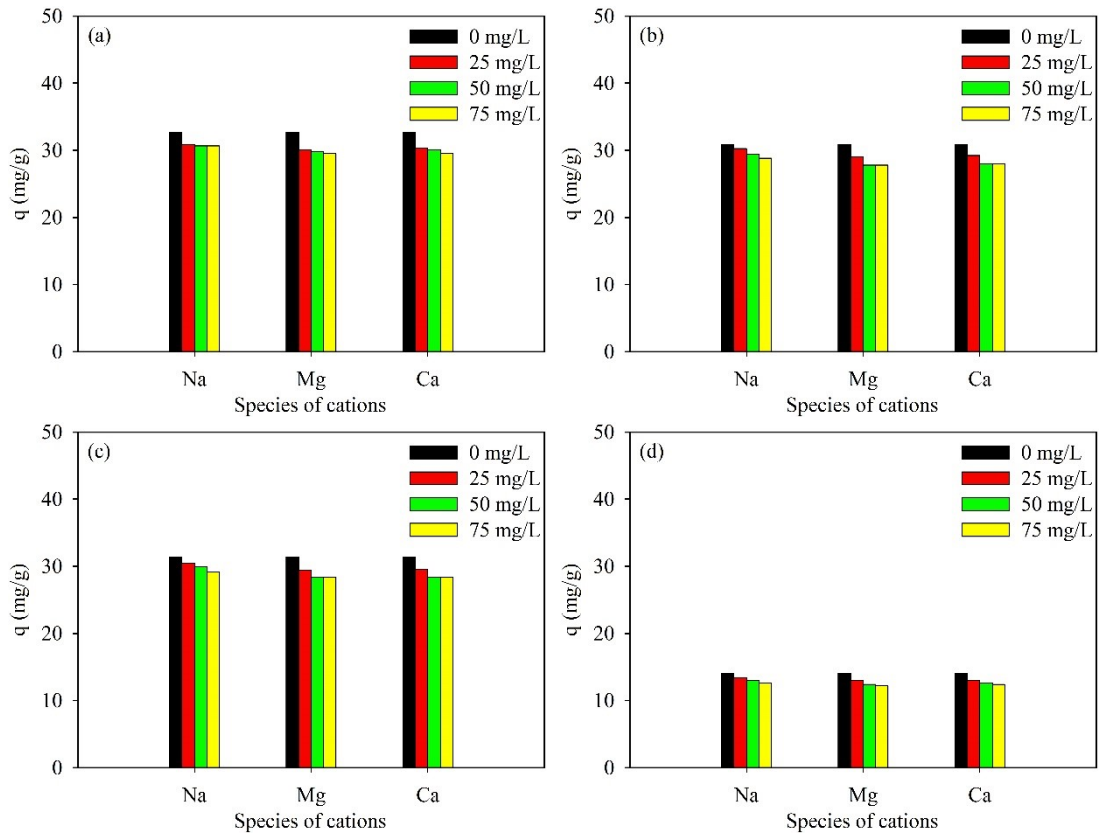

Fig.S2 Effects of different cations on  $Mn^{2+}$  adsorption of (a)Na-MnO<sub>x</sub>, (b)Mg-MnO<sub>x</sub>, (c)Ca-MnO<sub>x</sub> and (d)Fe-MnO<sub>x</sub>.

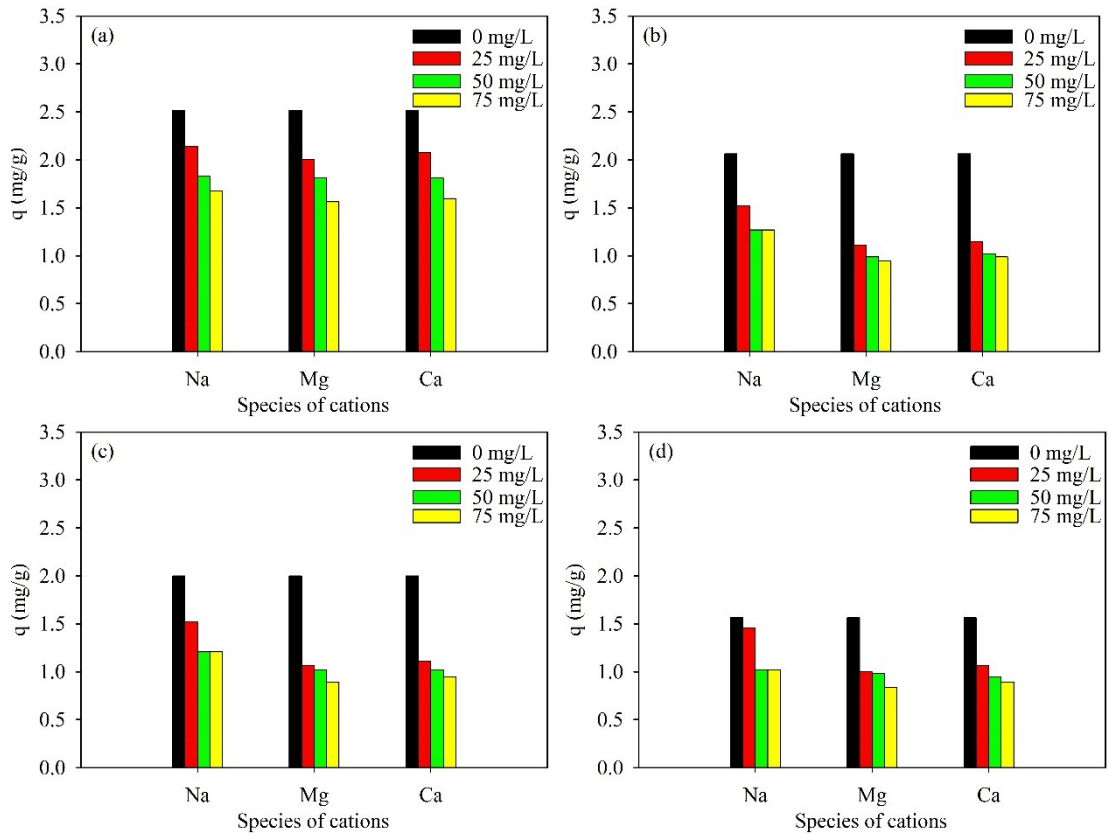

Fig.S3 Effects of cations on  $\text{NH}_4^+$  adsorption of (a)Na- $\text{MnO}_x$ , (b)Mg- $\text{MnO}_x$ , (c)Ca- $\text{MnO}_x$  and (d)Fe- $\text{MnO}_x$ .

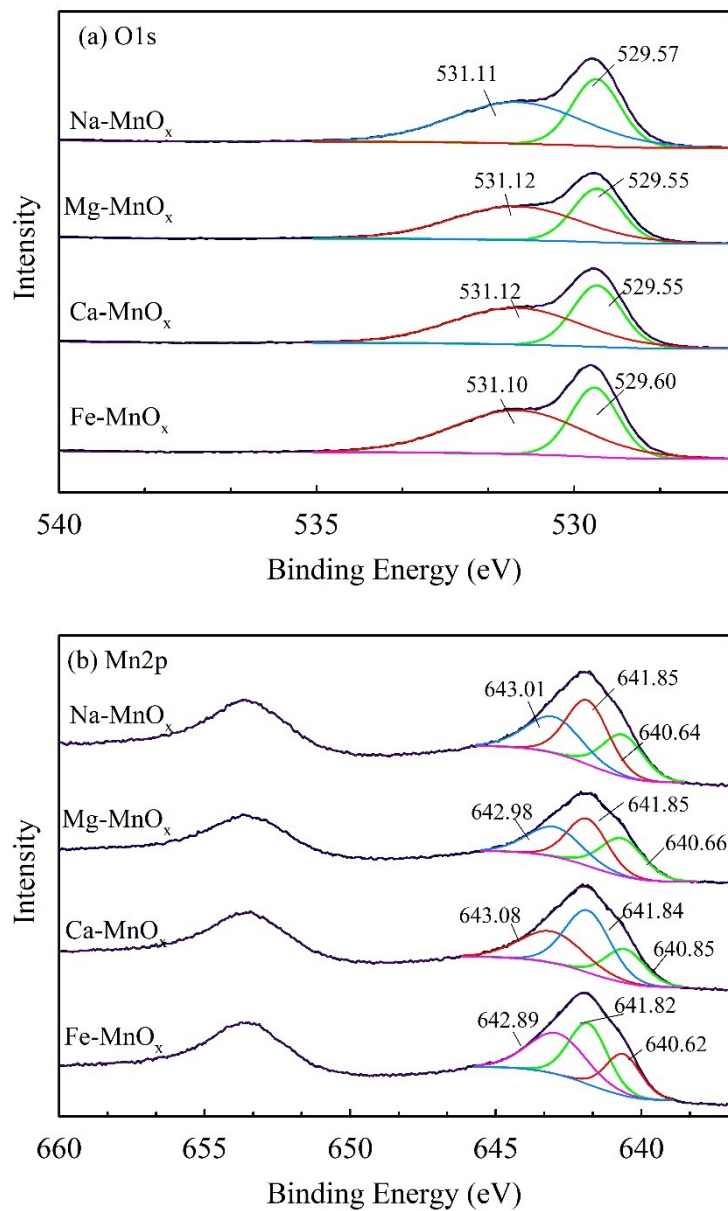

**Fig.S4** XPS profiles of O1s and Mn2p in manganese oxides after the reaction: (a) O1s, (b)Mn2p

## Tables

**Table S1** Atomic percentage of different species of O and Mn in manganese oxides after the reaction

| Species of<br>the oxides | Species of O (%)  |                 |                | Species of Mn (%) |       |       |
|--------------------------|-------------------|-----------------|----------------|-------------------|-------|-------|
|                          | O <sub>latt</sub> | O <sub>ad</sub> | O <sub>s</sub> | IV                | III   | II    |
| Na-MnO <sub>x</sub>      | 37.33             | 62.67           | /              | 31.21             | 41.99 | 26.8  |
| Mg-MnO <sub>x</sub>      | 37.70             | 62.30           | /              | 31.36             | 36.80 | 31.84 |
| Ca-MnO <sub>x</sub>      | 38.90             | 61.10           | /              | 32.31             | 45.85 | 21.83 |
| Fe-MnO <sub>x</sub>      | 36.76             | 63.24           | /              | 38.31             | 38.06 | 23.63 |
